# Supplementary material
Source: PubMed Central journal article supplement (PMC2871799)
Supplement: halms377444-supplement_1.pdf [file halms377444-supplement_1.pdf]

## Supplementary table I

| Natural cycle |                          |             |         | Stimulated cycle |                          |             |         |
|---------------|--------------------------|-------------|---------|------------------|--------------------------|-------------|---------|
| Gene ID       | Gene Name                | Fold Change | FRD (%) | Gene ID          | Gene Name                | Fold Change | FRD (%) |
| 204351_at     | <a href="#">S100P</a>    | 465         | 0       | 204351_at        | <a href="#">S100P</a>    | 17          | 0       |
| 206859_s_at   | <a href="#">PAEP</a>     | 457         | 0       | 206859_s_at      | <a href="#">PAEP</a>     | 59          | 0       |
| 205713_s_at   | <a href="#">COMP</a>     | 403         | 0       | -                | -                        | -           | -       |
| 203716_s_at   | <a href="#">DPP4</a>     | 165         | 0       | 203717_at        | <a href="#">DPP4</a>     | 3           | 1       |
| 208161_s_at   | <a href="#">ABCC3</a>    | 140         | 0       | 208161_s_at      | <a href="#">ABCC3</a>    | 18          | 0       |
| 205302_at     | <a href="#">IGFBP1</a>   | 139         | 0,5     | -                | -                        | -           | -       |
| 218002_s_at   | <a href="#">CXCL14</a>   | 132         | 0       | 218002_s_at      | <a href="#">CXCL14</a>   | 15          | 0       |
| 241031_at     | <a href="#">NLF1</a>     | 128         | 0       | 241031_at        | <a href="#">NLF1</a>     | 15          | 0       |
| 219140_s_at   | <a href="#">RBP4</a>     | 95          | 0       | -                | -                        | -           | -       |
| 203824_at     | <a href="#">TSPAN8</a>   | 93          | 0       | 203824_at        | <a href="#">TSPAN8</a>   | 7           | 0,7     |
| 1553809_a_at  | <a href="#">C9orf71</a>  | 85          | 0       | 231426_at        | <a href="#">C9orf71</a>  | 22          | 0       |
| 243483_at     | <a href="#">TRPM8</a>    | 66          | 0       | 243483_at        | <a href="#">TRPM8</a>    | 33          | 0       |
| 208335_s_at   | <a href="#">DARC</a>     | 58          | 0       | 208335_s_at      | <a href="#">DARC</a>     | 4           | 1       |
| 201348_at     | <a href="#">GPX3</a>     | 57          | 0       | 201348_at        | <a href="#">GPX3</a>     | 9           | 0       |
| 206378_at     | <a href="#">SCGB2A2</a>  | 50          | 0       | 206378_at        | <a href="#">SCGB2A2</a>  | 20          | 0       |
| 204988_at     | <a href="#">FGB</a>      | 46          | 0,5     | -                | -                        | -           | -       |
| 203256_at     | <a href="#">CDH3</a>     | 45          | 0       | -                | -                        | -           | -       |
| 235988_at     | <a href="#">GPR110</a>   | 45          | 0       | -                | -                        | -           | -       |
| 205654_at     | <a href="#">C4BPA</a>    | 43          | 0       | 205654_at        | <a href="#">C4BPA</a>    | 17          | 0       |
| 236489_at     | <a href="#">Hs.72307</a> | 43          | 0       | 236489_at        | <a href="#">Hs.72307</a> | 12          | 0       |
