# Supplementary material
Source: PubMed Central journal article supplement (PMC2871799)
Supplement: halms377444-supplement_2.pdf [file halms377444-supplement_2.pdf]

## Supplementary table II

| Gene symbol | other studies                |                     | current study                |                      |
|-------------|------------------------------|---------------------|------------------------------|----------------------|
|             | Natural cycle (LH+2 vs LH+7) | COS (LH+7 vs hCG+7) | Natural cycle (LH+2 vs LH+7) | COS (hCG+2 vs hCG+5) |
| IL15        | 3                            | -                   | 2.6                          | -                    |
| SPP1        | 11                           | -                   | 4.4                          | 3.5                  |
| GPX3        | 25.9                         | -11.9               | 57                           | 9                    |
| PAEP        | 81.6                         | -9.8                | 457                          | 59                   |
| FXVD2       | 4.1                          | 4.5                 | 7.3                          | 2.3                  |
| DPP4        | 31.4                         | -37.1               | 165.1                        | 2.5                  |
| LIF         | 36.6                         | -23                 | 19.8                         | -                    |
| IGFBP3      | 4                            | -4.3                | 3.4                          | -                    |
| GADD45A     | 8                            | -3                  | 6.8                          | 2.2                  |
| HABD2       | 5.9                          | -6.4                | 8.6                          | 3.5                  |
| EDNRB       | 8.2                          | -3.2                | 3.6                          | 2.3                  |
| LMOD1       | 29.7                         | -4.1                | 10                           | 2.3                  |
| CNN1        | 10.3                         | -9.3                | -                            | -                    |
| CLU         | 28.8                         | -7.1                | 7.9                          | 2.1                  |
| TAGLN       | 8.4                          | -3.7                | 5.2                          | -                    |
| CYP2C9      | 2.5                          | -4.7                | 8.3                          | 4.9                  |
| CAPN6       | -4.6                         | 10.3                | -                            | -                    |
| TFPI2       | -3.5                         | 5.4                 | -                            | -                    |
| MAP2K6      | -4.9                         | 8.6                 | -                            | 2.6                  |
| CTNNA2      | -8.5                         | 7.3                 | -                            | 4                    |
| SORD        | -2.4                         | 11.6                | -                            | 4.1                  |
| BCKDHB      | -3.3                         | 10.3                | -                            | -                    |
| ALDH3B2     | -3.1                         | 4.3                 | -                            | 3.8                  |
| NDRG2       | -6                           | 5.9                 | -                            | -                    |
| FOLR1       | -10.5                        | 9.3                 | -                            | 3.7                  |
