# Supplementary material
Source: PubMed Central journal article supplement (PMC2871799)

# Supplementary figure1

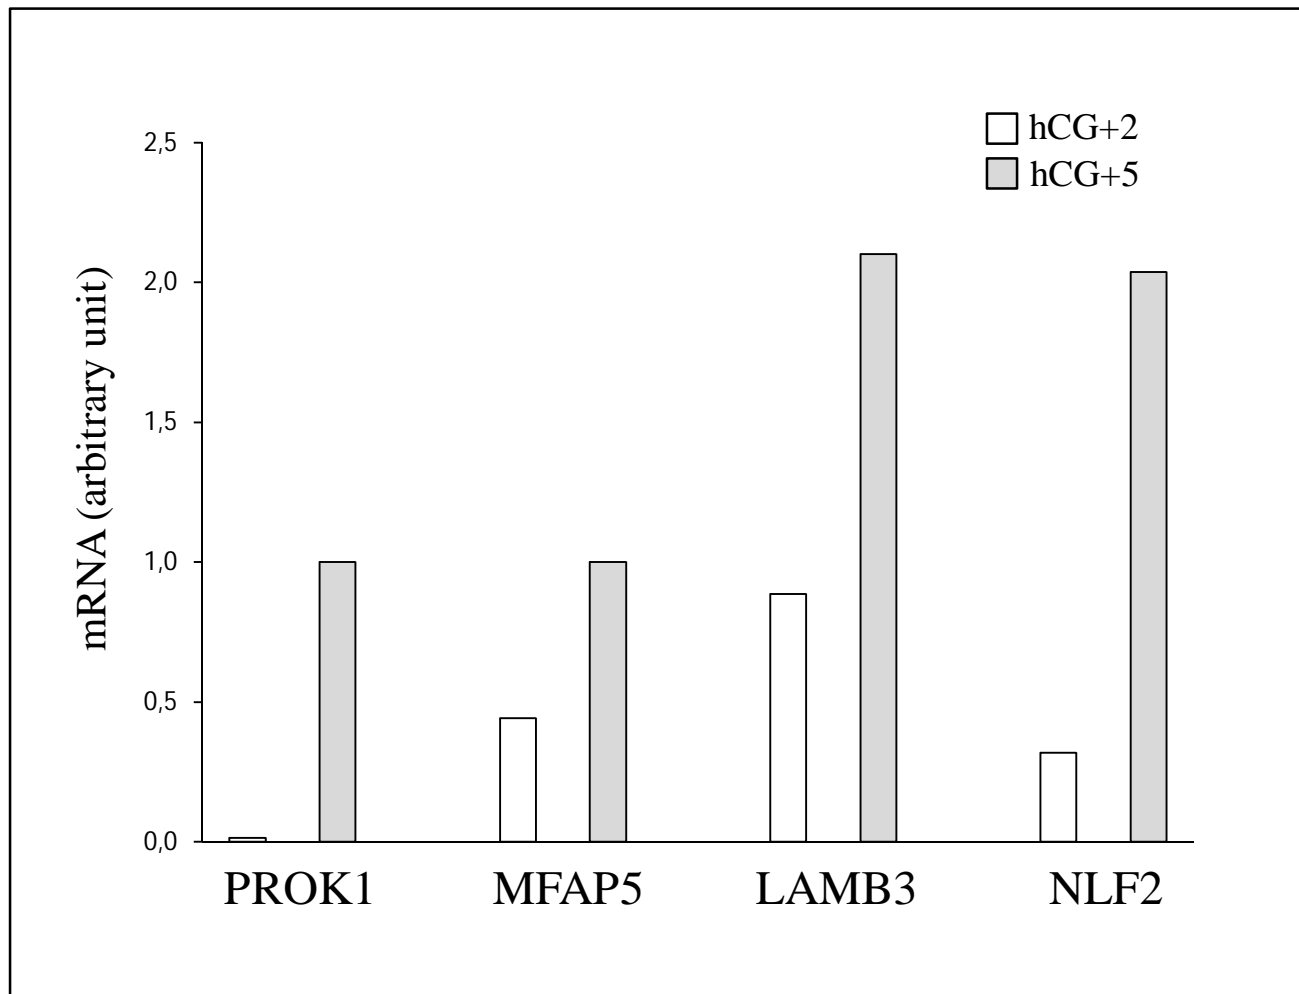

Supplement: halms377444-supplement_3.pdf [file halms377444-supplement_3.pdf]
